1 **Title**

2 Sublethal heat reduces overall reproductive investment and male allocation in a simultaneously  
3 hermaphroditic snail species

4  
5 **Authors**

6 Shanna van Dijk  
7 Valentina Zizzari  
8 Joris M. Koene  
9 Yumi Nakadera\*

10

11 **Affiliations**

12 Ecology and Evolution, Amsterdam Institute for Life and Environment (A-LIFE), Faculty of Science  
13 Vrije Universiteit Amsterdam, the Netherlands

14

15 \* [y.nakadera@vu.nl](mailto:y.nakadera@vu.nl)

16

17 **Abstract**

18 A well-known effect of sub-lethal temperature exposure in a diversity of species is a decrease in  
19 reproductive performance. Although this effect has been particularly emphasized for males or male  
20 reproductive functioning, it remains to be firmly demonstrated that the effect of heat on fertility is sex-  
21 specific. To contribute to this question, here we examined the impact of sub-lethally high temperature  
22 on male and female functions in a simultaneously hermaphroditic snail species, *Lymnaea stagnalis*.  
23 Examining hermaphrodites is useful to evaluate the sex-specific impacts of heat exposure, since they  
24 possess male and female functions within a single individual, sharing genetic and environmental  
25 factors. Moreover, previously developed sex allocation theory allows us to compare the differential  
26 performance of sex functions. In this study, we exposed snails to temperatures ranging from 20 to 28  
27 °C for 14 days and assessed their egg and sperm production, sperm transfer, mating behaviour and  
28 growth. Both types of gamete production were significantly reduced by higher temperature, leading to  
29 an overall reduction of reproductive investment. By quantifying sex allocation, we furthermore  
30 revealed that the heat-stressed snails reduced the relative investment in their male function. In  
31 addition, even though sperm production and its transfer were drastically decreased by high  
32 temperature, male mating motivation was not affected. This study illustrates that examining  
33 simultaneous hermaphrodites can provide significant insights for the impact of heat, and the  
34 proximate mechanism, on reproduction in wildlife.

35

36 *Keywords:*

37 Sex specificity, global warming, fertility, sex allocation, mating behaviour

38

## 39 Introduction

40 Evaluating the effects of elevated temperature on wildlife is an urgent task. It has been well  
41 established that not only the temperature at which an organism dies, i.e., Critical Thermal Limit (CTL),  
42 but also that the temperature at which fertility is lost, i.e., Thermal Fertility Limit (TFL), are crucial to  
43 determine the long-term viability of natural populations that experience increasing environmental  
44 temperatures (reviewed in Walsh et al. 2019a). For instance, Parrat et al. (2021) demonstrated that,  
45 across 43 *Drosophila* species, TFLs are commonly lower than CTLs, and the estimates of TFL greatly  
46 improve the model prediction on species distribution, implying that we are underestimating the  
47 impacts of global warming on natural populations. In addition, the reduced fertility under influence of  
48 heat has been reported in diverse plants and animals (e.g., Oshino et al. 2007; Sage et al. 2015;  
49 Paxton et al. 2016; Zizzari and Ellers 2011; Hurley et al. 2018; Sales et al. 2018; Stürup et al. 2013)  
50 including humans (e.g., Yogev et al. 2004). To date, however, it remains controversial which sex is  
51 more vulnerable to increasing temperatures (Iossa 2019; Walsh et al. 2019b). Based on several  
52 hypotheses, such as descended testicles in mammals, male or male reproductive functions are often  
53 the primary target to estimate TFLs. However, females also show reduced fertility under sublethal  
54 heat exposure (e.g., Blanckenhorn et al. 2014; Paxton et al. 2016; Zizzari and Ellers 2014). Although  
55 the sex-specificity of reduced fertility under heat would significantly improve the understanding of the  
56 physiological mechanisms causing such reduction, as well as their evolutionary consequences in  
57 wildlife, the experimental insights are limited and need urgent expansion (Prasad et al. 2011; Paxton  
58 et al. 2016; Park et al. 2017).

59  
60 Contrasting with separate-sexed species, simultaneous hermaphrodites (hereafter hermaphrodites)  
61 represent an optimal system to test which sex is more vulnerable against heat exposure. Since these  
62 organisms possess functional male and female reproductive systems within a single body, we can  
63 determine the effects of heat on both sex functions within the same individuals. Hence, in contrast to  
64 separate-sexed species, hermaphrodites allow us to compare the sex-specific effects of heat on  
65 reproduction without confounding effects, such as the influence of differential hormonal and genetic  
66 components, or sex-limited expression (e.g., Péliissié et al. 2012). In addition to this logistical  
67 advantage, the well-established theoretical framework to study and quantify sex allocation in  
68 hermaphrodites - how reproductive resources are allocated to the male or female function (e.g.,  
69 Charnov 1979, 1982; Schärer 2009) – offers predictive power. Obviously, the backbone of sex  
70 allocation theory is selection and adaptation – the theoretical framework aims to understand why  
71 organisms change sex allocation under certain social or environmental condition, as the consequence  
72 of selection over evolutionary time. However, sex allocation theory can equally well be applied to  
73 evaluate the impact of heat on reproduction in hermaphrodites, with the significant caveat that any  
74 observed changes in sex allocation under the influence of temperature are not necessarily adaptive.

75

76 To the best of our knowledge, however, there are barely any studies that examined the impact of heat  
77 on male and female functions in hermaphrodites, asking, for example, which sex is more vulnerable to  
78 heat, or if sex allocation changes depending on temperature. For example, in a self-fertilizing  
79 hermaphroditic fish, *Kryptolebias marmoratus*, Park et al. (2017) showed that fish exposed to high  
80 temperature had a relatively smaller gonadosomatic ratio, but not testis area. Further investigation  
81 revealed the disruption of hepatic vitellogenin synthesis at high temperature, which led them to  
82 conclude that high temperature affects ovarian development more than testicular development. In a  
83 sequentially hermaphroditic self-fertilizing nematode *Caenorhabditis briggsae*, the results indicated  
84 that the declined fertility under higher temperature is mostly due to the compromised fertility of  
85 developing sperm, but not oogenesis nor sperm count (Prasad et al. 2011). Lastly, in the  
86 hermaphroditic snail *Bulinus truncatus*, the exposure to high temperature during development tends to  
87 produce snails without a functional penis (Schrag and Read 1992). Even though such aphyallic  
88 individuals produce sperm and self-fertilize, they cannot transfer ejaculate to partners. Despite the  
89 lack of male mating ability, aphyallic snails were found to be as fecund as euphallic individuals and no  
90 difference in sex allocation was observed (e.g., Doums and Jarne 1996; Doums et al. 1998). Although  
91 the number of studies is fairly limited and all the study species were self-fertilizing hermaphrodites  
92 (indicating their male investment is low, regardless of temperature), previous studies indeed suggest  
93 that examining hermaphrodites could tell which sex function is more affected by heat, motivating us to  
94 examine the impacts of elevated temperature on hermaphrodites and their sex allocation.

95  
96 Given the above, we examined the impacts of heat exposure on reproduction in a hermaphroditic  
97 species, *Lymnaea stagnalis*. It has been well established in this species that exposure to higher  
98 temperatures alters egg production as well as immune response (Leicht and Seppälä 2019; Salo et al.  
99 2019; Leicht et al. 2013, 2017; Seppälä and Jokeka 2011), memory formation (Teskey et al. 2012;  
100 Sunada et al. 2016), food consumption (Zhang et al. 2018), synaptic transmission (Sidorov 2002),  
101 respiration (Sidorov 2012) and so forth (Salo et al. 2017). Also, the reproductive biology of *L. stagnalis*  
102 is well studied and their reproductive performances are readily quantifiable (e.g., sperm count: Loose  
103 and Koene 2008, fecundity: van Iersel et al. 2014, mating behaviour: Nakadera et al. 2015;  
104 Moussaoui et al. 2018). In this study, we focused on evaluating the difference between male and  
105 female functions, by comparing egg and sperm production by the same individuals. In addition, we  
106 measured the effect of heat on growth and mating behaviour. We report here that the snails exposed  
107 to 28 °C for two weeks reduced their overall investment in reproduction and their male function was  
108 diminished more than their female function. In addition, we revealed that their drastically reduced  
109 sperm production did not discourage them from mating in the male role.

110

111

112 **Material and Methods**

113 We used adult *L. stagnalis* from the long-standing lab culture at Vrije Universiteit Amsterdam. During  
114 rearing, these snails were kept in flow-through tanks with aerated low-copper water at  $20 \pm 1$  °C and a  
115 light:dark cycle of 12:12h. They were fed with broadleaf lettuce and fish flakes (TetraPhyll,  
116 TetraGmbH) *ad libitum*. We used an age-synchronized cohort of snails, which was three-month-old at  
117 the start of the experiment and fully sexually matured as evidence by their egg laying capability. This  
118 species is simultaneously hermaphroditic and shows unilateral mating, meaning that, in a single  
119 mating event, one snail acts as male (sperm donor) and its partner as female (sperm recipient). When  
120 motivated, they can swap their sex roles immediately after their first mating (Koene and Ter Maat  
121 2005).

122

### 123 *Heat exposure setup*

124 We randomly selected 48 snails to expose to 20 °C, 24 °C and 28 °C for 14 days, respectively (Fig. 1).  
125 We set 20 °C as control, because this is the standard rearing temperature and near their thermal  
126 optimum (Vaughn 1953; Van der Steen et al. 1969; Nakadera et al. 2015). We chose 24 °C and 28 °C  
127 as simulated warm and extremely warm summer conditions in shallow water bodies (see also Salo et  
128 al. 2019). We chose to examine the effect of continuous heating for 14 days, rather than a brief heat  
129 shock, as water is slow to increase or decrease its temperature compared to air. Moreover, this  
130 duration is long enough to evaluate the effect of heat on sperm production, since their  
131 spermatogenesis takes less than 10 days (De Jong-Brink et al. 1985, Nakadera et al. 2020). To  
132 achieve these heat treatments, we used six aquariums (ca. 15 L) with heaters. These aquariums have  
133 a slow flow-through of aerated water, similar to the standard breeding tanks. Within an aquarium, we  
134 placed 8 perforated containers (400 ml) to monitor the snails. To acclimate the snails to a designated  
135 temperature, we put snails in a closed container with water at 20 °C, and placed the container in the  
136 aquarium for a few hours until the water inside the container had the same temperature as the  
137 surrounding aquarium water. Then, we exchanged the closed containers with perforated containers to  
138 initiate heat exposure. Throughout the experiment, we fed the snails with a lettuce disc (ca. 19.6 cm<sup>2</sup>)  
139 per day per capita. Due to the limited number of available aquariums with individual thermostats, we  
140 ran the same experiment twice to ensure a high enough sample size (N = 96).

141

142 In the first week of heat exposure, we kept two snails together in a container, allowing for depletion of  
143 sperm that they had produced and stored in their seminal vesicles before the exposure. We randomly  
144 assigned one snail in a pair as focal, by placing a small amount of nail polish on the non-focal  
145 individual. Then, at the start of the second week, we removed the non-focal snails from the  
146 containers. After exposing the focal snails to the designated temperature for a total of 14 days (see  
147 Figure 1), we quantified their sperm and egg productions at the end of Week 2. Furthermore, on Day  
148 15, we provided a mating partner to each focal snail, in order to examine their mating behaviour as  
149 well as sperm transfer. In addition, we measured growth of all the focal snails. Based on the sperm

150 and egg production data, we also compared the total investment in reproduction and determined sex  
151 allocation across treatments. We describe how we collected these data in the following.

152

### 153 *Growth*

154 Before the start of the temperature treatment, we measured the shell length of focal snails using  
155 Vernier callipers. At the end of the exposure, we measured the shell length of focals again to see how  
156 much the snails have grown in two weeks.

157

### 158 *Egg production*

159 At the start of Week 2, we provided new containers to each focal individual. At the end of the  
160 temperature exposure, we randomly assigned half of the focal snails for measuring egg and sperm  
161 production. From the selected focal individuals, we collected all the egg masses laid in Week 2. We  
162 scanned the collected egg masses using a flatbed scanner and glass plates with spacers (Canon  
163 LiDE 220; see more details in the video instruction in van Iersel et al. 2014). The scanned images of  
164 egg masses were used to count the number of egg masses and number of eggs laid using ImageJ  
165 (ver. 1.53t, Schneider et al. 2012).

166

### 167 *Sperm production*

168 The focal snails that were used for quantifying egg production, immediately after the treatment, were  
169 subsequently used to dissect out their seminal vesicles in order to estimate how many sperm they  
170 produced and stored in Week 2. We used the method of sperm counting published, with a few  
171 modifications (Loose and Koene 2008). First, we euthanized the snails by slowly injecting ca. 2 ml of  
172 50 mM MgCl<sub>2</sub> through their foot into the haemocoel using a syringe and needle (30G x ½"). Next,  
173 using a coarse forceps, we removed the shell and pinned the soft body onto a dissection plate. Then,  
174 using a fine forceps and scissors, we carefully dissected out the whole seminal vesicles and placed  
175 these into 800 µl of *Lymnaea* saline solution in a 2 ml tube. Within the solution, we tore apart the duct  
176 with a fine forceps and then vortexed for 30 sec. Next, we transferred the duct to a new tube with 400  
177 µl of saline and vortexed it for 30 sec again. We repeated this last step one more time, removed the  
178 duct and collected all the solutions into the first tube. After vortexing it for another 30 sec, we took 5 µl  
179 of sperm suspension to count the sperm heads, using a Neubauer improved cell counter, and  
180 repeated this counting four times for each sample. Lastly, we applied the formula in Loose and Koene  
181 (2008) to estimate the number of sperm in the original sperm suspension (depth: 0.1 mm, the number  
182 of squares counted: 5, the area of each square: 0.04 mm<sup>2</sup>).

183

### 184 *Mating behaviour*

185 One day after Week 2, we let the remaining set of focal snails copulate with partner snails to measure  
186 mating behaviour and sperm transfer. At the end of the temperature treatment, we kept these snails in  
187 a flow-through tank at 20 °C for one day. We also isolated partner snails for four days in perforated

188 containers placed in the same flow-through tank. For identification purposes, we put a small amount  
189 of nail polish on the shell of partners. Since the focal snails were isolated for eight days, they were  
190 fully motivated to copulate as male (Van Duivenboden and Ter Maat 1985; De Boer et al. 1997), and  
191 more so than their four-day isolated partners.

192

193 On the day of mating observation, we placed one focal and one partner snail together in a container  
194 filled with ca. 400 ml of water. The mating observation was conducted for six hours (09:00-15:00) at  
195 the control temperature ( $20 \pm 1$  °C). According to the series of stereotypical mating behaviours in this  
196 species (Koene 2010), we checked all the pairs every 10 min and scored whether they were (i) not in  
197 contact, (ii) the focal (or partner) was crawling on the partner's shell (mounting), (iii) the focal was  
198 probing or inseminating. Since insemination usually takes 20-60 min, this sampling interval ensured  
199 not missing any copulation.

200

201 Based on the mating behaviour data, we counted how many focal individuals mated, and which sex  
202 roles they performed first (male or female). We also calculated the duration of mating latency (how  
203 long they took to initiate courtship behaviour), that of courtship, and that of insemination. For the  
204 analyses of mating behaviour, we only used the cases where focal snails acted as male first, because  
205 it is hard to define when they started courtship behaviour if they first mates as females. Moreover,  
206 mating as female first has been shown to affects sperm transfer (Nakadera et al. 2014).

207

#### 208 *Investment for reproduction and Sex allocation*

209 The change in sperm and egg production in response to temperature further motivated us to examine  
210 the change in total reproductive investment as well as sex allocation. To do so, we first made egg and  
211 sperm production measurements comparable by standardizing them (mean 0, SD 1) and adding 3 to  
212 all the values to make them non-negative. Then, we set that as the total of standardized egg and  
213 sperm production as total reproductive investment. For sex allocation, we used the ratio of  
214 standardized sperm production divided by total reproductive investment.

215

#### 216 *Sperm transfer*

217 Immediately after the focal snail inseminated their partner, we took out the partner and dissected out  
218 the vaginal duct which was extensively swollen with ejaculate received (see the method above). We  
219 placed the extracted duct in the tube with 400 µl of saline, and tore it apart to release the sperm  
220 transferred. We followed the same protocol of sperm counting as above, expect that the total amount  
221 of sperm suspension was 1200 µl, not 1600 µl. That is because the number of sperm transferred was  
222 expected to be less than that produced.

223

#### 224 *Statistics*

225 We carried out all the statistical analyses in R (ver. 4.2.1, R Core Team 2022). Throughout the

226 experiment, we collected the data for growth, egg production, sperm production, sperm transfer and  
227 mating behaviour (mating rate, mating role, mating latency, courtship duration, insemination duration).  
228 To test if there is any difference between treatments, we applied a statistical model with Treatment (20,  
229 24 and 28 °C) and Run (Run 1 and 2) as fixed factors including interaction. To compare the growth  
230 between treatments, we calculated the shell length differences before and after exposure and ran a  
231 GLM with Gaussian distribution. To explain the difference we observed, we also ran the same test for  
232 the shell length at the start of experiments. To compare the egg production, we used a GLM with Poisson  
233 distribution for the number of egg masses, and a GLM with Gaussian distribution for the number of eggs  
234 and the number of eggs per egg mass. When there was a significant difference, we applied a Tukey  
235 post hoc test. Supplementary, we also compared the number of eggs per egg mass using the same  
236 method. To test the sperm production, sperm transfer, total investment for reproduction and sex  
237 allocation, we used GLMs with Gaussian distribution and Tukey post hoc tests. For mating rate and  
238 mating role, we used GLMs with binomial distribution. Lastly, for the other mating behaviour data, we  
239 applied Kruskal-Wallis tests (without including Run as fixed factor), since these variables were not  
240 normally distributed.

241

242

## 243 **Results**

244 Throughout the experiments, two out of 96 snails died in the 28 °C treatment of Run 2. These two  
245 snails were excluded from all the analyses.

246

### 247 *Growth*

248 Due to marker loss, the sample sizes for growth data were 29 for 20 °C, 25 for 24°C, and 30 for  
249 28 °C. Within the duration of 2 weeks, we did not detect any difference in growth between treatments  
250 (GLM,  $F_{2,81} = 1.88$ ,  $P = 0.159$ , Fig. 2), although there was a significant difference between Run (GLM,  
251  $F_{1,80} = 11.91$ ,  $P = 0.001$ , Interaction:  $F_{2,78} = 0.30$ ,  $P = 0.739$ , Fig. 2). Note that, since we used the  
252 same age cohort of snails for both Runs, they had a two-week age difference, and their size of snails  
253 in Run 2 was indeed larger at the start of the experiment (GLM, Run:  $F_{1,80} = 24.83$ ,  $P < 0.001$ , Fig. 2).

254

### 255 *Egg production*

256 Two snails in the 28 °C treatment did not laid eggs. Therefore, we did not include them to compare  
257 the egg production across treatments. There was no difference in the number of egg masses laid  
258 across treatments (Fig. 3), but the total number of eggs laid was significantly lower in the snails in  
259 28 °C compared to those in 20 °C (GLM, Treatment:  $F_{2,42} = 7.65$ ,  $P = 0.002$ , Run:  $F_{1,41} = 13.36$ ,  $P =$   
260  $0.001$ , Interaction:  $F_{2,39} = 2.75$ ,  $P = 0.076$ , Fig. 3). This was also reflected in the number of eggs per  
261 egg mass, which showed the same pattern as the total number of eggs laid (GLM, Treatment:  $F_{2,42} =$   
262  $6.23$ ,  $P = 0.004$ , Run:  $F_{1,41} = 10.45$ ,  $P = 0.002$ , Interaction:  $F_{2,39} = 2.68$ ,  $P = 0.081$ , Fig. 3). Even  
263 though not statistically significant, we like to highlight the difference between Runs at 24°C. These two

264 groups of snails had an age difference of two weeks (Fig. 3), and this becomes more prominent in our  
265 sex allocation analysis below. Compared to the control (20 °C), egg production was reduced to  
266 40.6 % on average at 28 °C.

267

#### 268 *Sperm production*

269 We detected a significant reduction of sperm production in the snails at 28 °C (GLM, Treatment:  
270  $F_{2,44}=82.91$ ,  $P < 0.001$ , Run:  $F_{1,43} = 0.44$ ,  $P = 0.510$ , Interaction:  $F_{2,41} = 2.80$ ,  $P = 0.072$ , Fig. 4a). On  
271 average, compared to the control, the snails at 28 °C produced 64.1 % less sperm.

272

#### 273 *Sperm transfer*

274 Because we can measure sperm transfer only when the focal snails had copulated, the sample size is  
275 smaller and varying (Run1: N = 17, Run2: N = 16, 20 °C: N = 12, 24°C: N = 14, 28 °C: N = 7). The  
276 data show a very similar pattern to the sperm production results: the snails at 28 °C transferred  
277 significantly less sperm to their mating partner (Treatment:  $F_{2,30}=20.88$ ,  $P < 0.001$ , Run:  $F_{1,29} = 2.08$ ,  $P$   
278  $= 0.160$ , Interaction:  $F_{2,27} = 0.91$ ,  $P = 0.413$ , Fig. 4b). On average, compared to the control, the snails  
279 at 28 °C transferred 73.7 % less sperm.

280

#### 281 *Mating behaviour*

282 The mating rate did not differ between treatments, when they mated with non-heat-treated, control  
283 partners (Treatment:  $\chi^2_2 = 1.96$ ,  $P = 0.098$ , Fig. 5). Their mating roles also did not differ significantly  
284 between treatments (Treatment:  $\chi^2_2 = 3.31$ ,  $P = 0.354$ , Fig. 5). For the remaining mating behaviour  
285 data, we had to exclude one sample (Run 2, 28 °C) that we prematurely interrupted for sperm  
286 counting; the focal snail had not transferred an ejaculate yet. Nonetheless, we did not find any  
287 significant difference in mating latency (Kruskal-Wallis test,  $\chi^2_2 = 1.16$ ,  $P = 0.559$ , Fig. 6), courtship  
288 duration (Kruskal-Wallis test,  $\chi^2_2 = 1.85$ ,  $P = 0.397$ , Fig. 6) and insemination duration (Kruskal-Wallis  
289 test,  $\chi^2_2 = 1.73$ ,  $P = 0.420$ , Fig. 6).

290

#### 291 *Investment for reproduction and sex allocation*

292 There was a significant reduction in total reproductive investment in the 28 °C treatment (Treatment:  
293  $F_{2,42} = 44.51$ ,  $P < 0.001$ , Run:  $F_{1,41} = 8.61$ ,  $P = 0.006$ , Interaction:  $F_{2,39} = 0.66$ ,  $P = 0.521$ , Fig. 7). Sex  
294 allocation was also different across treatments and as well as Run and interaction (Treatment:  $F_{2,42} =$   
295  $12.82$ ,  $P < 0.001$ , Run:  $F_{1,41} = 13.54$ ,  $P = 0.001$ , Interaction:  $F_{2,39} = 4.35$ ,  $P = 0.027$ , Fig. 7). The male  
296 allocation in the snails exposed to 28 °C was significantly reduced, compared to the control treatment.  
297 The interaction was most likely due to the variation between Runs in the 24 °C treatment (Fig. 7),  
298 suggesting that this is an effect of age, as also shown in egg production at 24 °C.

299

300

#### 301 **Discussion**



302 We found that exposing snails to sub-lethal temperature significantly reduced both egg and sperm  
303 productions, and that their male function was more vulnerable than their female function. Also, we  
304 found that, despite of their reduced sperm production and transfer, their male mating motivation was  
305 not affected. Lastly, we did not observe any effect of heat on growth. In the following, we will discuss  
306 these findings and place them in a broader ecological and evolutionary perspective.

307

308 The control group invested equally in male and female reproduction, which is in accordance with  
309 previous studies looking at sex allocation in this species (Koene et al. 2006; Hoffer et al. 2010). We  
310 found that the total investment in reproduction especially declined in the snails exposed to 28 °C. This  
311 pattern supports the consensus that reproduction is vulnerable to sublethal heat exposure (Walsh et  
312 al. 2019). Our results also indicate that snails exposed to 28 °C allocated proportionally more to their  
313 female function, compared to the control snails (Fig. 7). The shifted sex allocation and diminished  
314 sperm production and transfer leads us to conclude that the male function is more vulnerable to heat  
315 stress in this species. We designed the experiment with the aim to measure the consequence of heat  
316 on spermatogenesis, even though this species continuously produces sperm after maturation.

317 Previous work has shown that one week of isolation suffices to fully replenish the components of  
318 ejaculate in this species, increasing their male mating motivation (Van Duivenboden and Ter Maat  
319 1985; De Boer et al. 1997). Thus, we are confident that snails in 28 °C treatment did not fully  
320 replenish their sperm reserves. Clearly, it remains to be determined which spermatogenesis stage is  
321 affected and whether the produced sperm are viable. In addition, the observed interaction with heat  
322 treatment and experimental runs in sex allocation implies that the temperature vulnerability may be  
323 age specific. That is, even though they are only two weeks apart, the younger snails might be more  
324 vulnerable.

325

326 We found that sperm production was reduced under heat and this reduction strongly influenced the  
327 sperm transfer of *L. stagnalis* (Fig. 4), but not their mating motivation and behaviour (Fig. 5, 6). Since  
328 this species transfers sperm at the end of insemination (Weggelaar et al. 2019), it is expected to have  
329 the disassociation between the number of sperm transferred and insemination duration. Also, we like  
330 to emphasize that the snails at 20 °C and 24 °C transferred approximately 50% of sperm stored, and  
331 the snails at 28 °C used almost all sperm they had (Fig. 4). This pattern implies that the snails know  
332 how many sperm they have in seminal vesicles; for a different species it has been shown that sperm  
333 release can be controlled by the donor (Geoffroy et al. 2005). However, their male mating motivation  
334 was not affected as drastically as one would imagine from their reduced sperm production (Fig. 4).  
335 Crucially, such unaffected male mating motivation in *L. stagnalis* was also observed in a different  
336 context. When snails receive seminal fluid proteins, they significantly reduce the number of sperm  
337 transferred in a subsequent mating (Nakadera et al. 2014), although their male mating motivation  
338 stays unchanged (Nakadera et al. 2015). The observed mismatch of reduced sperm production and  
339 unchanged male mating motivation in this study is particularly concerning for field populations, since

340 the heated snails would waste energy by transferring a few sperm, while facing the higher risk of  
341 infection due to compromised immune defence (e.g., Seppälä and Jokela 2011; Leicht et al. 2013).  
342 We like to stress that we chose to let the snails have a day at 20 °C before mating, to test the effect of  
343 reduced sperm production on mating behaviour. This 'rest' day might have affected their male mating  
344 motivation and behaviour. For future research, it would be interesting to directly examine how heat  
345 affects mating behaviour.

346

347 We did not find an effect of heat on growth in our experimental design. However, it is likely that, if we  
348 had kept the snails under heat treatment for a longer period, we would have detected such a  
349 difference (e.g., Leicht et al. 2013; Hoefnagel and Verberk 2017; Salo et al. 2019). The trend that the  
350 snails at 28 °C show might be seen as a confirmation for this previously reported response, and is not  
351 surprising given their increased metabolic rate due to the temperature increase. Even though there is  
352 a positive correlation between body size and female fecundity in this species (Koene et al. 2007), we  
353 observed a significant reduction in egg production under heat (Fig. 3B, also see Leicht et al. 2013;  
354 Salo et al. 2019). This reduction probably occurs because the heated snails deposited less eggs in an  
355 egg mass, rather than changing their egg laying frequency (Fig. 3C). Similar to sperm production, we  
356 did not measure the quality of eggs produced under heat, and do not know which stage of egg  
357 production was affected by heat. Since *L. stagnalis* can store and use sperm from mating partners for  
358 ca. three months (Cain 1956; Nakadera et al. 2014b), the snails should have had plenty of sperm to  
359 fertilize during the treatment, although we cannot exclude the possibility that the stored sperm got  
360 deteriorated under heat.

361

362 This study demonstrated that examining hermaphrodites provides vital insights on the sex differences  
363 under heat, which is not accessible in separate-sexed species. As commonly expected or assumed in  
364 diverse species (Sage et al. 2015; Walsh et al. 2019a,b; Iossa 2019), the male function of *L. stagnalis*  
365 is more sensitive to elevated temperature, which means that the proxy mechanism of those  
366 responses can be shared across wide range of species. As many hermaphrodites, *L. stagnalis*  
367 produces sperm and eggs in a same organ called ovotestis (Davison 2006; Koene et al., 2006).  
368 Although the ovotestis is a particularly interesting target organ, its current understanding in  
369 gastropods is relatively limited, in terms of gene expression, distribution of oo- and spermatogenesis  
370 sites, or the fate determination of germ cells. This study paved the path to investigate the proximate  
371 mechanisms of reduced male and female fertility under heat in a hermaphroditic species and to  
372 predict the implications in natural populations. Moreover, with temperature projected to increase in  
373 future, we hope this study motivates further studies investigating the impact of heat exposure in wide  
374 range of hermaphrodites.

375

376 **Acknowledgement**

377 We thank Omer Ballaoui and Esther D. Hoekman for setting the aquariums up and maintaining the  
378 snail culture in the lab, and Angus Davison and Simultaneous Hermaphroditic Organism Workshop  
379 (SHOW) community for inspirations and encouragements (including Lukas Schärer, Cynthia Norton,  
380 Janet Leonard, Steven A. Ramm, Maria Christina Lorenzi, Alexandra Staikou, Chiara Benvenuto).

381

## 382 **Footnotes**

### 383 **Competing interests**

384 The authors declare no competing or financial interests.

385

### 386 **Author contributions**

387 Conceptualization: Y.N., J.M.K., V.Z.; Methodology: Y.N., J.M.K., V.Z.; Formal analyses:  
388 Y.N., S.v.D.; Investigation: S.v.D., Y.N.; Data curation S.v.D.; Writing – original draft: Y.N.;  
389 Writing – review and editing: Y.N., J.M.K., V.Z.; Supervision: Y.N., J.M.K., V.Z.; Project  
390 administration: J.M.K.

391

### 392 **Funding**

393 During this project, J.M.K. and Y.N. were funded by NWO Open competition Klein.

394

## 395 **Reference**

396 Blanckenhorn, W. U., Gautier, R., Nick, M., Puniamoorthy, N., & Schäfer, M. A. (2014). Stage- and  
397 sex-specific heat tolerance in the yellow dung fly *Scathophaga stercoraria*. *Journal of Thermal*  
398 *Biology*, 46, 1-9.

399

400 Cain, G. L. (1956). Studies on cross-fertilization and self-fertilization in *Lymnaea stagnalis* Appressa  
401 Say. *The Biological Bulletin*, 111, 45-52.

402

403 Charnov, E. L. (1979). Simultaneous hermaphroditism and sexual selection. *Proceedings of the*  
404 *National Academy of Sciences of the United States of America*, 76, 2480-2484.

405

406 Davison, A. (2006). The ovotestis: An underdeveloped organ of evolution. *BioEssays*, 28, 642-650.

407

408 De Boer, P. A. C. M., Jansen, R. F., Koene, J. M., & Ter Maat, A. (1997). Nervous control of male  
409 sexual drive in the hermaphroditic snail *Lymnaea stagnalis*. *Journal of Experimental Biology*, 951,  
410 941-951.

411

412 De Jong-Brink, M., Jager, J. C., Bolwerk, E. L. M., & Jong, J. T. L. (1985). Statistical analysis of  
413 frequencies and proportions of cytologically classified spermatogenesis cells in the hermaphroditic

- 414 snail *Lymnaea stagnalis*. 1. A study of diurnal variations. *International journal of invertebrate*  
415 *Reproduction and Development*, 8, 149-159.
- 416
- 417 Doums, C., & Jarne, P. (1996). The evolution of phally polymorphism in *Bulinus truncatus*  
418 (Gastropoda, Planorbidae): the cost of male function analysed through life-history traits and sex  
419 allocation. *Oecologia*, 106(4), 464-469.
- 420
- 421 Doums, C., Perdieu, M.-A., & Jarne, P. (1998). Resource allocation and stressful conditions in the  
422 aphyllid snail *Bulinus truncatus*. *Ecology*, 79(2), 720-733.
- 423
- 424 Geoffroy, E., Hutcheson, R., & CHASE, R. (2005). Nervous control of ovulation and ejaculation in *Helix*  
425 *aspersa*. *Journal of molluscan studies*, 71(4), 393-399.
- 426
- 427 Hoefnagel, K. N., & Verberk, W. C. E. P. (2017). Long-term and acute effects of temperature and  
428 oxygen on metabolism, food intake, growth and heat tolerance in a freshwater gastropod. *J Therm*  
429 *Biol*, 68(Pt A), 27-38.
- 430
- 431 Hoffer, J. N. A., Ellers, J., & Koene, J. M. (2010). Costs of receipt and donation of ejaculates in a  
432 simultaneous hermaphrodite. *BMC evolutionary biology*, 10, 393.
- 433
- 434 Hurley, L. L., McDiarmid, C. S., Friesen, C. R., Griffith, S. C., & Rowe, M. (2018). Experimental  
435 heatwaves negatively impact sperm quality in the zebra finch. *Proceedings of the Royal Society B:*  
436 *Biological Sciences*, 285.
- 437
- 438 Iossa, G. (2019). Sex-Specific Differences in Thermal Fertility Limits. *Trends in Ecology and*  
439 *Evolution*, 34, 490-492.
- 440
- 441 Koene, J. M. (2010). Neuro-endocrine control of reproduction in hermaphroditic freshwater snails:  
442 mechanisms and evolution. *Frontiers in behavioral neuroscience*, 4, 167.
- 443
- 444 Koene, J. M., & Ter Maat, A. (2005). Sex role alternation in the simultaneously hermaphroditic pond  
445 snail *Lymnaea stagnalis* is determined by the availability of seminal fluid. *Animal Behaviour*, 69, 845-  
446 850.
- 447
- 448 Koene, J. M., Montagne-Wajer, K., & Ter Maat, A. (2006). Effects of frequent mating on sex allocation  
449 in the simultaneously hermaphroditic great pond snail (*Lymnaea stagnalis*). *Behavioral Ecology and*  
450 *Sociobiology*, 60, 332-338.
- 451

- 452 Lee Teskey, M., Lukowiak, K. S. K., Riaz, H., Dalesman, S., & Lukowiak, K. S. K. (2012). Research  
453 article: What's hot: The enhancing effects of thermal stress on long-term memory formation in  
454 *Lymnaea stagnalis*. *Journal of Experimental Biology*, 215, 4322-4329.  
455
- 456 Leicht, K., Jokela, J., & Seppälä, O. (2013). An experimental heat wave changes immune defense  
457 and life history traits in a freshwater snail. *Ecology and Evolution*, 3, 4861-4871.  
458
- 459 Leicht, K., Seppälä, K., & Seppälä, O. (2017). Potential for adaptation to climate change: Family-level  
460 variation in fitness-related traits and their responses to heat waves in a snail population. *BMC*  
461 *Evolutionary Biology*, 17, 1-10.  
462
- 463 Leicht, K., & Seppälä, O. (2019). Direct and transgenerational effects of an experimental heatwave on  
464 early life stages in a freshwater snail. *Freshwater Biology*, 64, 2131-2140.  
465
- 466 Leicht, K., Jokela, J., & Seppälä, O. (2019). Inbreeding does not alter the response to an experimental  
467 heat wave in a freshwater snail. *PLoS ONE*, 14, 1-12.  
468
- 469 Loose, M. J., & Koene, J. M. (2008). Sperm transfer is affected by mating history in the  
470 simultaneously hermaphroditic snail *Lymnaea stagnalis*. *Invertebrate Biology*, 127, 162-167.  
471
- 472 Moussaoui, R., Verdel, K., Benbellil-Tafoughalt, S., & Koene, J. M. (2018). Female behaviour prior to  
473 additional sperm receipt in the hermaphroditic pond snail *Lymnaea stagnalis*. *Invertebrate*  
474 *Reproduction and Development*, 62, 82-91.  
475
- 476 Nakadera, Y., Blom, C., & Koene, J. M. (2014). Duration of sperm storage in the simultaneous  
477 hermaphrodite *Lymnaea stagnalis*. *Journal of Molluscan Studies*, 80, 1-7.  
478
- 479 Nakadera, Y., Swart, E. M., Hoffer, J. N. A., den Boon, O., Ellers, J., Koene, J. M. (2014). Receipt of  
480 seminal fluid proteins causes reduction of male investment in a simultaneous hermaphrodite. *Current*  
481 *biolog : CB*, 24, 859-862.  
482
- 483 Nakadera, Y., Swart, E. M., Maas, J. P. A., Montagne-Wajer, K., Ter Maat, A., & Koene, J. M. (2015).  
484 Effects of age, size, and mating history on sex role decision of a simultaneous hermaphrodite.  
485 *Behavioral Ecology*, 26, 232-241.  
486
- 487 Nakadera, Y., Thornton Smith, A., Daupagne, L., Coutellec, M., Koene, J. M., & Ramm, S. A. (2020).  
488 Divergence of seminal fluid gene expression and function among natural snail populations. *Journal of*  
489 *Evolutionary Biology*, 33, 1440-1451.

490  
491 Oshino, T., Abiko, M., Saito, R., Ichiishi, E., Endo, M., Kawagishi-Kobayashi, M. et al. (2007).  
492 Premature progression of anther early developmental programs accompanied by comprehensive  
493 alterations in transcription during high-temperature injury in barley plants. *Mol Genet Genomics*,  
494 278(1), 31-42.  
495  
496 Park, C. B., Kim, Y. J., & Soyano, K. (2017). Effects of increasing temperature due to aquatic climate  
497 change on the self-fertility and the sexual development of the hermaphrodite fish, *Kryptolebias*  
498 *marmoratus*. *Environmental Science and Pollution Research*, 24, 1484-1494.  
499  
500 Parratt, S. R., Walsh, B. S., Metelmann, S., White, N., Manser, A., Bretman, A. J. et al. (2021).  
501 Temperatures that sterilize males better match global species distributions than lethal temperatures.  
502 *Nature Climate Change*, 11(6), 481-484.  
503  
504 Paxton, C. W., Baria, M. V., Weis, V. M., & Harii, S. (2016). Effect of elevated temperature on  
505 fecundity and reproductive timing in the coral *Acropora digitifera*. *Zygote*, 24(4), 511-516.  
506  
507 Prasad, A., Croydon-Sugarman, M. J., Murray, R. L., & Cutter, A. D. (2011). Temperature-dependent  
508 fecundity associates with latitude in *Caenorhabditis briggsae*. *Evolution*, 65(1), 52-63.  
509  
510 Péliissié, B., Jarne, P., & David, P. (2012). Sexual selection without sexual dimorphism: Bateman  
511 gradients in a simultaneous hermaphrodite. *Evolution* 66, 66-81.  
512  
513 Sage, T. L., Bagha, S., Lundsgaard-Nielsen, V., Branch, H. A., Sultmanis, S., & Sage, R. F. (2015).  
514 The effect of high temperature stress on male and female reproduction in plants. *Field Crops*  
515 *Research*, 182, 30-42.  
516  
517 Sales, K., Vasudeva, R., Dickinson, M. E., Godwin, J. L., Lumley, A. J., Michalczyk, Ł. et al. (2018).  
518 Experimental heatwaves compromise sperm function and cause transgenerational damage in a  
519 model insect. *Nature Communications*, 9, 4771.  
520  
521 Salo, T., Stamm, C., Burdon, F. J., Räsänen, K., & Seppälä, O. (2017). Resilience to heat waves in  
522 the aquatic snail *Lymnaea stagnalis*: Additive and interactive effects with micropollutants. *Freshwater*  
523 *Biology*, 62, 1831-1846.  
524  
525 Salo, T., Kropf, T., Burdon, F. J., & Seppälä, O. (2019). Diurnal variation around an optimum and  
526 near-critically high temperature does not alter the performance of an ectothermic aquatic grazer.  
527 *Ecology and Evolution*, 9, 11695-11706.

528

529 Schneider, C. A., Rasband, W. S., & Eliceiri, K. W. (2012). NIH Image to ImageJ: 25 years of image  
530 analysis. *Nature methods*, 9(7), 671-675.

531

532 Schrag, S. J., & Read, A. F. (1992). Temperature determination of male outcrossing ability in a  
533 simultaneous hermaphrodite. *Evolution*, 46(6), 1698-1707.

534

535 Schärer, L. (2009). Tests of sex allocation theory in simultaneously hermaphroditic animals. *Evolution*,  
536 63, 1377-1405.

537

538 Seppälä, O., & Jokela, J. (2011). Immune defence under extreme ambient temperature. *Biology*  
539 *Letters*, 7, 119-122.

540

541 Sidorov, A. V. (2002). Effect of temperature on synaptic transmission between identified neurones of  
542 the mollusc *Lymnaea stagnalis*. *Neuroscience letters*, 333(1), 1-4.

543

544 Sidorov, A. V. (2012). Temperature dependence of monoamine-induced pulmonary respiration in the  
545 mollusc *Lymnaea stagnalis*. *Journal of Evolutionary Biochemistry and Physiology*, 48(3), 287-294.

546

547 Steen, W. J. V. D., Hoven, N. P. V. D., & Jager, J. C. (1968). A method for breeding and studying  
548 freshwater snails under continuous water change, with some remarks on growth and reproduction in  
549 *Lymnaea stagnalis* (L.). *Netherlands Journal of Zoology*, 19, 131-139.

550

551 Stürup, M., Baer-Imhoof, B., Nash, D. R., Boomsma, J. J., & Baer, B. (2013). When every sperm  
552 counts: Factors affecting male fertility in the honeybee *Apis mellifera*. *Behavioral Ecology*, 24, 1192-  
553 1198.

554

555 Sunada, H., Riaz, H., De Freitas, E., Lukowiak, K. K., Swinton, C., Swinton, E. et al. (2016). Heat  
556 stress enhances LTM formation in *Lymnaea*: Role of HSPs and DNA methylation. *Journal of*  
557 *Experimental Biology*, 219, 1337-1345.

558

559 Van Duivenboden, Y. A., & Ter Maat, A. (1985). Masculinity and receptivity in the hermaphrodite pond  
560 snail, *Lymnaea stagnalis*. *Animal Behaviour*, 33, 885-891.

561

562 Van Iersel, S., Swart, E. M., Nakadera, Y., van Straalen, N. M., & Koene, J. M. (2014). Effect of male  
563 accessory gland products on egg laying in gastropod molluscs. *Journal of visualized experiments:*  
564 *JoVE*, 88, e51698.

565

- 566 Vaughn, C. M. (1953). Effects of Temperature on Hatching and Growth of *Lymnaea stagnails*  
567 appressa Say. *The American Midland Naturalist*, 49, No. 1(Jan., 1953), 214-228.  
568
- 569 Walsh, B. S., Parratt, S. R., Hoffmann, A. A., Atkinson, D., Snook, R. R., Bretman, A. et al. (2019).  
570 The Impact of Climate Change on Fertility. *Trends in Ecology and Evolution*, 34, 249-259.  
571
- 572 Walsh, B. S., Parratt, S. R., Atkinson, D., Snook, R. R., Bretman, A., & Price, T. A. R. (2019). Thermal  
573 fertility limits and sex: an integrated approach. *Trends in Ecology and Evolution*.  
574
- 575 Weggelaar, T. A., Commandeur, D., & Koene, J. M. (2019). Increased copulation duration does not  
576 necessarily reflect a proportional increase in the number of transferred spermatozoa. *Animal Biology*,  
577 69, 95-115.  
578
- 579 Yogev, L., Kleiman, S., Shabtai, E., Botchan, A., Gamzu, R., Paz, G. et al. (2004). Seasonal  
580 variations in pre- and post-thaw donor sperm quality. *Hum Reprod*, 19(4), 880-885.  
581
- 582 Zhang, P., Blonk, B. A., van den Berg, R. F., & Bakker, E. S. (2018). The effect of temperature on  
583 herbivory by the omnivorous ectotherm snail *Lymnaea stagnalis*. *Hydrobiologia*, 812(1), 147-155.  
584
- 585 Zizzari, Z. V., & Ellers, J. (2011). Effects of exposure to short-term heat stress on male reproductive  
586 fitness in a soil arthropod. *Journal of Insect Physiology*, 57, 421-426.  
587
- 588 Zizzari Z.V., Ellers J. 2014. Rapid shift in thermal resistance between generations through maternal  
589 heat exposure. *Oikos*, 123:1365-1370.  
590



591 **Figure legends**

592 Fig 1. Experimental design. In Week 1, we allowed the snails to mate in pair, so that they used up  
593 gametes produced and stored prior to heat treatment. In Week 2, we removed one snail from each  
594 container to keep the focal snail isolated. Half of the focal snails was used to measure the production  
595 of both types of gametes, as indicated by the pictograms of an egg and sperm, at the end of Week 2.  
596 On the following day, we let the other half of the focal snails copulate with the lab snails to measure  
597 mating behaviour and sperm transfer (see mating snail and sperm pictogram).

598  
599 Fig. 2. Growth across heat treatments. A. The body size at the start of experiment. The individuals in  
600 Run 2 were larger than those in Run 1, since they are 2 weeks older. B. Growth. We plot the  
601 difference of shell length at the start and end of experiment as growth. The box plots show median,  
602 first and third quartiles and range of data points.

603  
604 Fig. 3. Egg production across heat treatment. A. Total number of egg masses laid in Week 2. B. Total  
605 number of eggs laid in Week 2. C. The average number of eggs per egg mass. The letters above box  
606 plots indicate the outcome of Tukey post hoc tests. The box plots show median, first and third  
607 quartiles and range of data points.

608  
609 Fig. 4. Sperm production across heat treatment. A. The estimated number of sperm produced in  
610 Week 2. B. The estimated number of sperm transferred to a mating partner on Week 2 + 1d. The  
611 letters above bar plots indicate the outcome of Tukey post hoc tests. The box plots show median, first  
612 and third quartiles and range of data points.

613  
614 Fig. 5. A. Mating rate after heat treatment. We counted how many focal individuals mated with control,  
615 non-heat-treated snails. B. Mating role after heat treatment. We counted how many focal snails acted  
616 as male or female in their first mating with control snails.

617  
618 Fig. 6. Mating behaviours of heat-treatment snails mating with control partners. We measured the  
619 male mating behaviour of focal snails when they acted as male first. A. Mating latency. We plotted the  
620 duration from the start of mating trial until a focal snail initiated male courtship behaviour. B. Courtship  
621 duration. We measured the duration of courtship from mounting to the end of probing. C. Insemination  
622 duration. The y-axis indicates the duration of ejaculate transfer. The box plots show median, first and  
623 third quartiles and range of data points.

624  
625 Fig. 7. Investment for reproduction and sex allocation. The letters above bar plots indicate the  
626 outcome of Tukey post hoc tests. The box plots show median, first and third quartiles and range of  
627 data points.

628

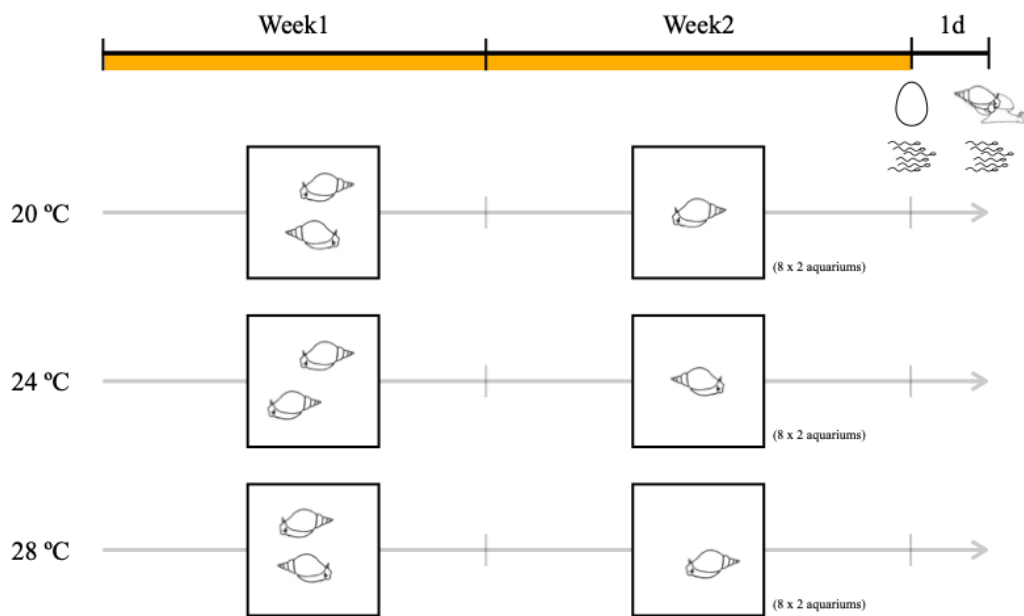

629

630 Fig. 1.

631

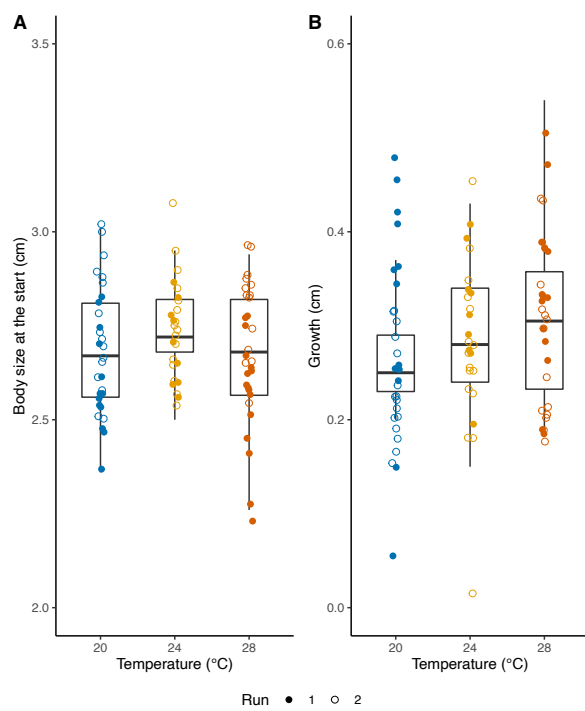

632

633 Fig. 2.

634

635

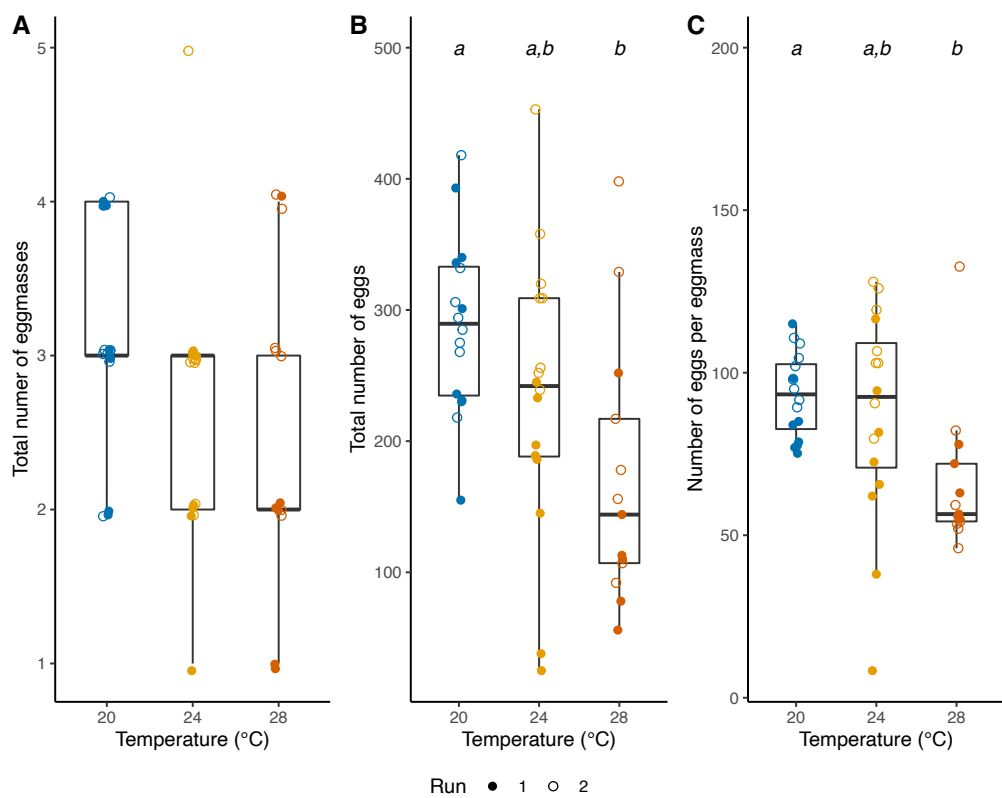

636

637 Fig. 3.

638

639

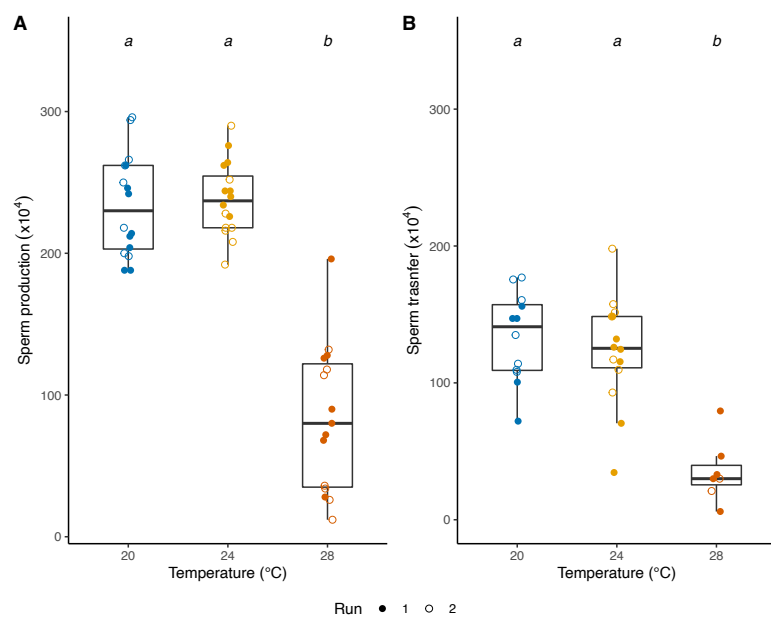

640

641 Fig. 4.

642

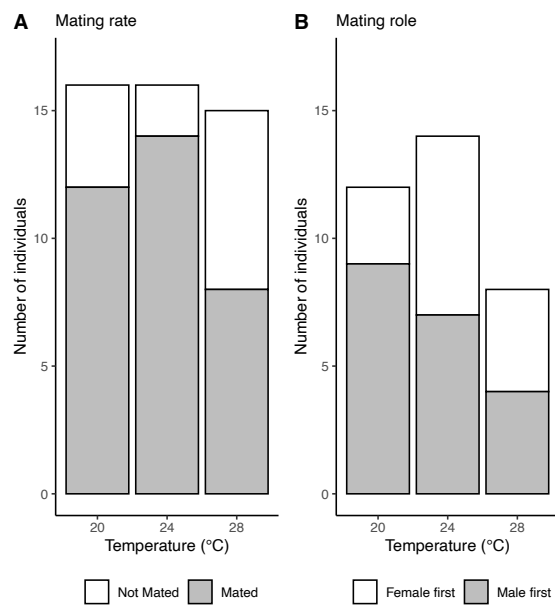

643

644 Fig. 5.

645

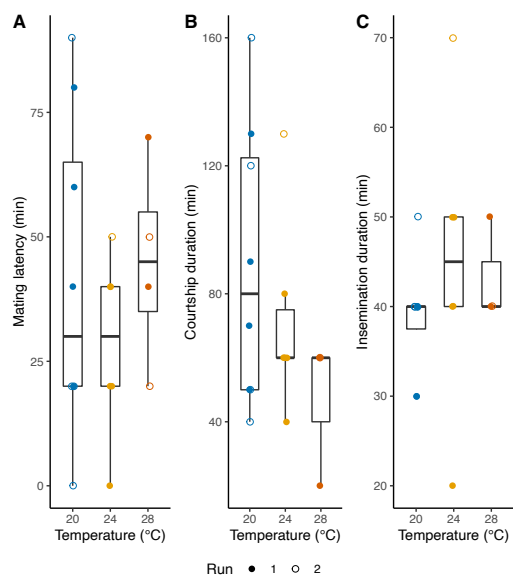

646

647 Fig. 6.

648

649

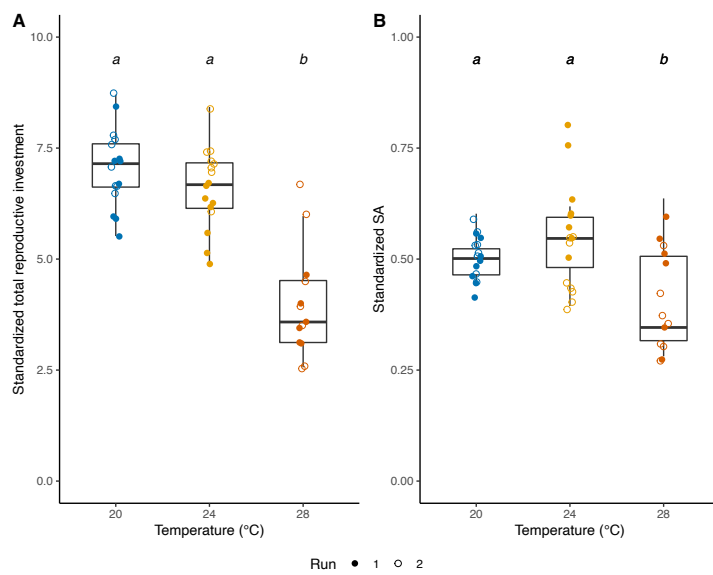

650  
651 Fig. 7.  
652
